# Supplementary material
Source: bioRxiv or medRxiv preprint supplement (https://www.biorxiv.org/highwire/filestream/9425/field_highwire_adjunct_files/0/035170-1.pdf)
Supplement: Supplementary file [file 035170-1.pdf]

## Supplementary Figures and Tables

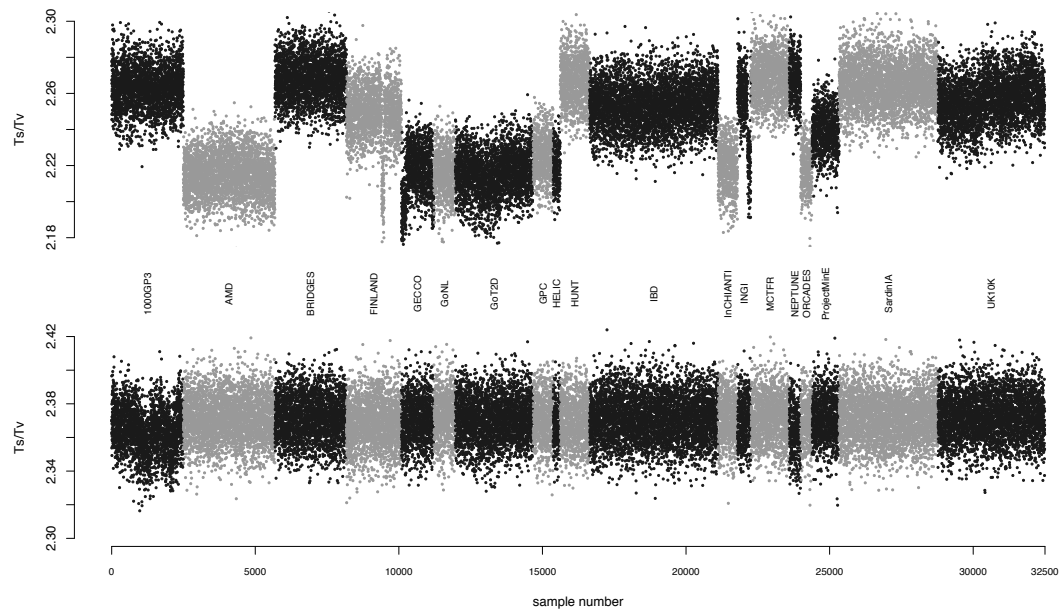

**Supplementary Figure 1 :** The top figure shows the per-sample transition-transversion ratio ( $Ts/Tv$ ) for chromosome 20 after running the GLPhase genotype calling method on the full MAC5 site list. In the bottom figure, GLPhase was run after the site filtering described in the text.

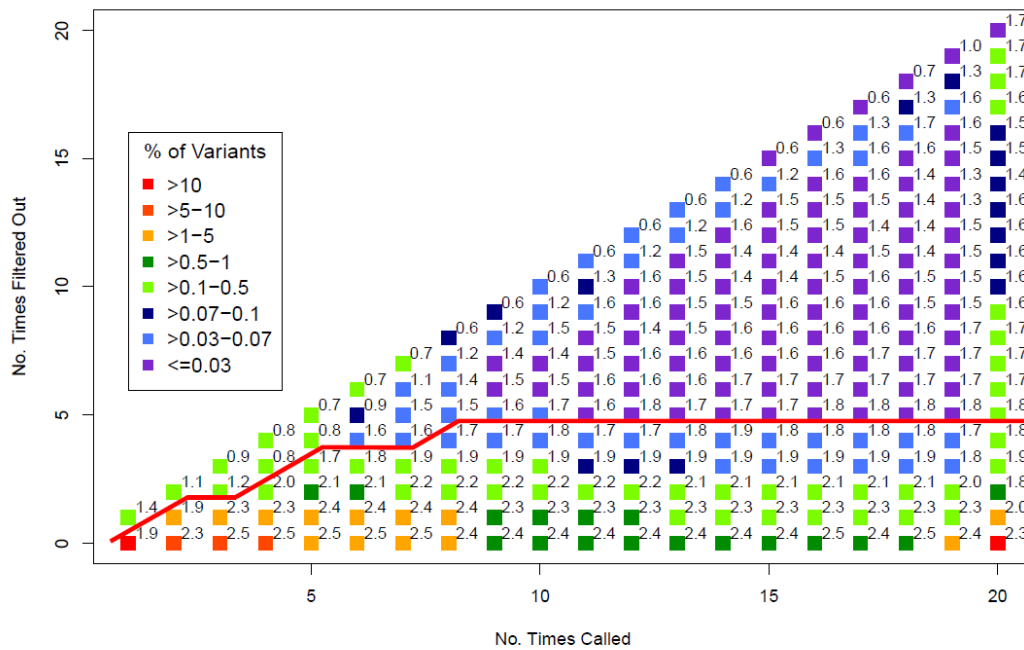

**Supplementary Figure 2 :** This figure shows sites stratified by their called and filtered status. On the x-axis we show the number of studies a variant was called in (out of 20) and on the y-axis we show the number of times it was filtered out by the cohort-specific internal QC pipelines. The color shows the percentage of variants in each such cell (red means more than 10% of variants lie in that cell while blue means less than 0.1%). The number to the top right of each cell denotes the  $T_s/T_v$  ratio for all sites in that cell. Cells higher in the plot have been filtered out relatively often and usually represent poor variants, as is also seen from the low  $T_s/T_v$  ratio. All variants above the red line were filtered out (which excludes all cells which had been filtered independently by more than 4 studies or have  $T_s/T_v$  ratio less than 1.7)

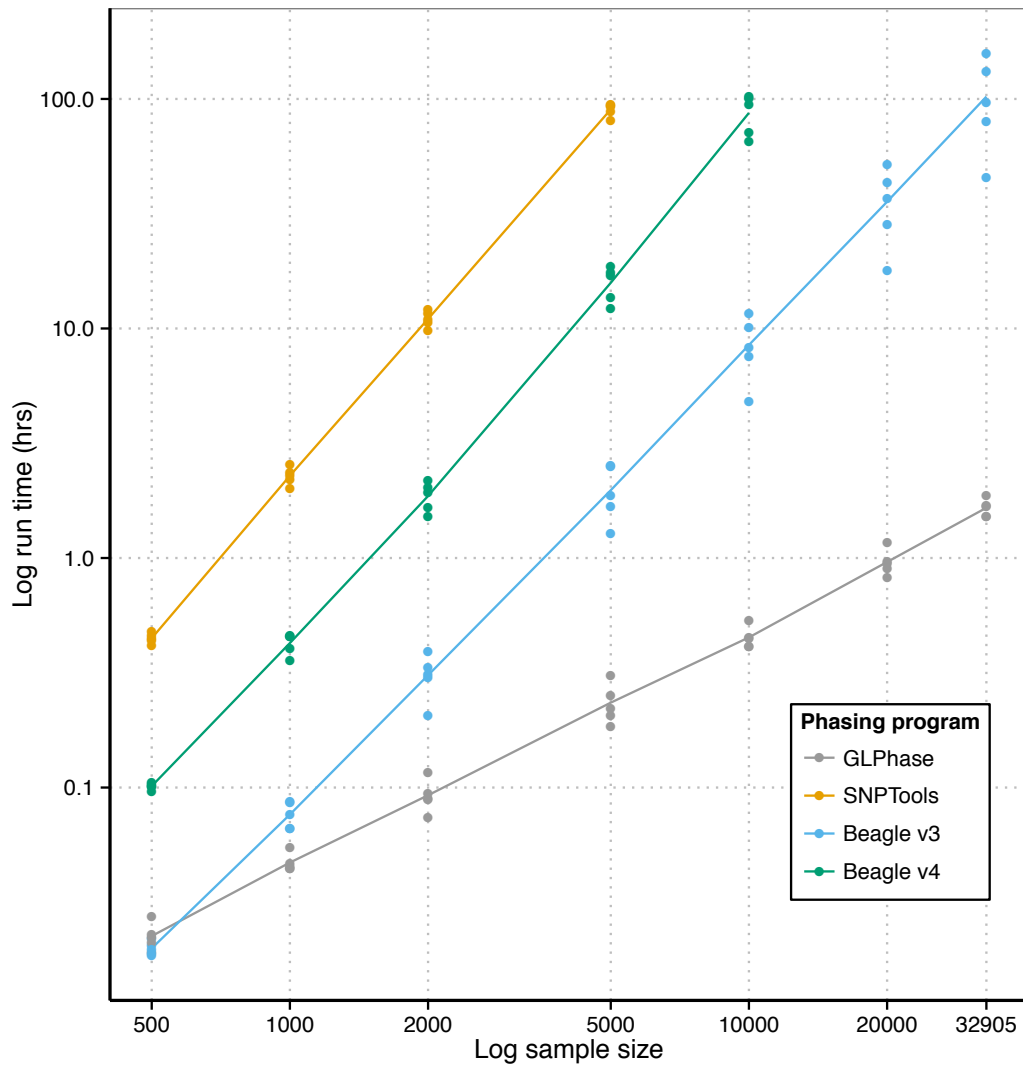

**Supplementary Figure 3 : Comparison of methods for genotype calling as sample size increases.** The figure shows a log-log plot of run time vs sample size for four different methods of genotype calling from GL data. For each sample size 5 random 1024 site chunks from chromosome 20 were used. Each dot represents the run time of a single dataset. Lines are drawn between successive means of run times for each value of sample size.

**Supplementary Table 1 :** Table detailing studies that contributed datasets to the HRC. Details of study size, sequencing depth, webpages of studies and primary references are given. (see **SuppTable1.xlsx**)

| <b>Sites</b>                       | <b>Samples</b>              | REF/REF | REF/ALT | ALT/ALT | NRD  |
|------------------------------------|-----------------------------|---------|---------|---------|------|
| <b>1000GP3</b>                     | <b>1000GP3 (N=2,525)</b>    | 0.10    | 0.61    | 0.43    | 0.70 |
|                                    | <b>HRC Pilot (N=13,309)</b> | 0.07    | 0.36    | 0.27    | 0.43 |
|                                    | <b>HRC full (N=32,905)</b>  | 0.06    | 0.34    | 0.25    | 0.41 |
| <b>HRC MAC5</b>                    | <b>1000GP3 (N=2,525)</b>    | 0.10    | 0.59    | 0.40    | 0.67 |
|                                    | <b>HRC Pilot (N=13,309)</b> | 0.06    | 0.38    | 0.26    | 0.43 |
|                                    | <b>HRC full (N=32,905)</b>  | 0.06    | 0.36    | 0.24    | 0.41 |
| <b>HRC MAC5 +<br/>site filters</b> | <b>1000GP3 (N=2,525)</b>    | 0.10    | 0.59    | 0.40    | 0.67 |
|                                    | <b>HRC Pilot (N=13,309)</b> | 0.06    | 0.36    | 0.25    | 0.42 |
|                                    | <b>HRC full (N=32,905)</b>  | 0.06    | 0.34    | 0.23    | 0.39 |

**Supplementary Table 2: Evaluation of genotype calling process.** The table reports discordance rates of genotypes called using different sites lists (Sites column) and sample sets (Samples column). NRD = non reference allele discordance percentage.

| <b>Variants present in HRC panel so HRC MAF can be determined (affects 1000G counts relative to all 1000G variants passing QC)</b> |                                                     |                        |                              |                  |                   |
|------------------------------------------------------------------------------------------------------------------------------------|-----------------------------------------------------|------------------------|------------------------------|------------------|-------------------|
| Imputation Panel                                                                                                                   | HRC Minor Allele Frequency<br>(minus 1000G Samples) |                        |                              |                  | Total             |
|                                                                                                                                    | MAC $\geq 0$<br>& $< 1\%$                           | MAC $> 0$ &<br>$< 1\%$ | MAF $\geq 1\%$<br>to $< 5\%$ | MAF $\geq 5\%$   |                   |
| <b>1000 Genomes Phase 3<br/>v5</b>                                                                                                 | <b>3,488,324</b>                                    | <b>3,461,032</b>       | <b>1,930,001</b>             | <b>5,309,997</b> | <b>10,728,322</b> |
| <b>HRC v1</b>                                                                                                                      | <b>7,833,143</b>                                    | <b>7,817,460</b>       | <b>2,243,365</b>             | <b>5,425,008</b> | <b>15,501,516</b> |

The total number of SNPs in the InCHIANTI study passing imputation quality ( $\geq 0.5$ ) broken down by allele frequency bins defined by the HRC (after excluding 1000 Genomes Phase 3 (v5) samples).

| <b>Variants present in 1000G Phase 3 (v5) AND HRC Panels (Michigan server) (affects HRC counts) : intersection N = 28,106,873</b> |                                                     |                        |                              |                  |                   |
|-----------------------------------------------------------------------------------------------------------------------------------|-----------------------------------------------------|------------------------|------------------------------|------------------|-------------------|
| Imputation Panel                                                                                                                  | HRC Minor Allele Frequency<br>(minus 1000G Samples) |                        |                              |                  | Total             |
|                                                                                                                                   | MAC $\geq 0$<br>& $< 1\%$                           | MAC $> 0$ &<br>$< 1\%$ | MAF $\geq 1\%$<br>to $< 5\%$ | MAF $\geq 5\%$   |                   |
| <b>1000 Genomes Phase 3<br/>v5</b>                                                                                                | <b>3,488,324</b>                                    | <b>3,461,032</b>       | <b>1,930,001</b>             | <b>5,309,997</b> | <b>10,728,322</b> |
| <b>HRC v1</b>                                                                                                                     | <b>5,734,139</b>                                    | <b>5,718,467</b>       | <b>2,231,559</b>             | <b>5,399,097</b> | <b>13,364,795</b> |

The total number of SNPs in the InCHIANTI study imputed from both imputation panels passing imputation quality ( $\geq 0.5$ ) broken down by allele frequency bins defined by the HRC (after excluding 1000 Genomes Phase 3 (v5) samples).

**Supplementary Table 3 : Summary of imputed variants in the InCHIANTI study.**

| Trait | SNP chr:bp<br>(build 37) | Effect<br>SE<br>Size | P-value | InCHIANTI<br>MAF | Nearest<br>Gene | 1000G<br>P-value | HRC<br>Imputation | 1000G<br>imputation |
|-------|--------------------------|----------------------|---------|------------------|-----------------|------------------|-------------------|---------------------|
|-------|--------------------------|----------------------|---------|------------------|-----------------|------------------|-------------------|---------------------|

|                                     |              | (SD) |      |                       |       |                 |                       | Quality | Quality |
|-------------------------------------|--------------|------|------|-----------------------|-------|-----------------|-----------------------|---------|---------|
| <b>Lactic Dehydrogenase</b>         | 3:52551566   | 2.37 | 0.29 | $6 \times 10^{-16}$   | 0.006 | <i>STAB1</i>    | $3 \times 10^{-05}$   | 0.79    | 0.74    |
| <b>Magnesium</b>                    | 17:9689132   | 2.26 | 0.38 | $4.5 \times 10^{-09}$ | 0.004 | <i>DHRS7C</i>   | NA                    | 0.67    | 0.01    |
| <b>Resistin</b>                     | 16:17685354  | 1.36 | 0.24 | $1.9 \times 10^{-08}$ | 0.009 | <i>XYLT1</i>    | $1.2 \times 10^{-06}$ | 0.9     | 0.79    |
| <b>Free Thyroxine (FT4)</b>         | 9:7092298    | 3.26 | 0.58 | $2 \times 10^{-08}$   | 0.002 | <i>KDM4C</i>    | NA                    | 0.84    | NA      |
| <b>Vitamin D</b>                    | 19:11599979  | 1.47 | 0.19 | $2.8 \times 10^{-08}$ | 0.013 | <i>ZNF653</i>   | $1.4 \times 10^{-05}$ | 0.9     | 0.59    |
| <b>Retinol</b>                      | 11:19870163  | 1.79 | 0.32 | $3 \times 10^{-08}$   | 0.004 | <i>NAV2</i>     | NA                    | 0.94    | NA      |
|                                     | 5:129871638  | 2.8  | 0.5  | $3.6 \times 10^{-08}$ | 0.002 | <i>CHSY3</i>    | NA                    | 0.79    | 0.41    |
| <b><math>\beta</math>-Globulins</b> | 15:100810864 | 1.71 | 0.31 | $3.6 \times 10^{-08}$ | 0.005 | <i>ADAMTS17</i> | $2 \times 10^{-07}$   | 0.81    | 0.53    |
| <b>Potassium</b>                    | 11:102811514 | 1.43 | 0.26 | $3.7 \times 10^{-08}$ | 0.006 | <i>MMP13</i>    | $1.2 \times 10^{-06}$ | 0.94    | 0.77    |

**Supplementary Table 4** : Potentially novel associations in the InCHIANTI study found by imputing SNPs using HRC release 1. The table lists the trait being tested and summary information about the SNP and the association signal.

(see SuppTable4.xlsx)

| Imputation Panel     | Effect size (SDs) | p-value             | Imputation quality |
|----------------------|-------------------|---------------------|--------------------|
| <b>HRC release 1</b> | <b>-2.07</b>      | $2 \times 10^{-13}$ | <b>0.98</b>        |
| <b>1000GP3</b>       | <b>-1.86</b>      | $3 \times 10^{-11}$ | <b>0.87</b>        |
| <b>HapMap2</b>       | -                 | -                   | -                  |

**Supplementary Table 5** : Summary of association signal at SNP rs28929474 using imputed data from 3 different reference panels. The SNP does not exist in the HapMap2 panel.

| Site List                            | Source/Type     |
|--------------------------------------|-----------------|
| Human CNV370-Quad                    | Chip (Illumina) |
| Human 660W-Quad                      | Chip (Illumina) |
| Human OmniExpress                    | Chip (Illumina) |
| Human Omni1-Quad                     | Chip (Illumina) |
| Human Omni5                          | Chip (Illumina) |
| Human CoreExome                      | Chip (Illumina) |
| Metachip                             | Chip (Illumina) |
| Affy Genome-Wide Human SNP Nsp/Sty   | Chip (Affy)     |
| Affy Genome-Wide Human SNP Array 6.0 | Chip (Affy)     |
| UK Biobank                           | Biobank Study   |
| GIANT Consortium                     | GWAS Study      |
| Global Lipids Genetics Consortium    | GWAS Study      |

**Supplementary Table 6** : List of commercial genotyping arrays and study lists used to add SNPs back in after site filtering.

| Number of samples | Studies     |             | Removal choice                                                                                                                                              |
|-------------------|-------------|-------------|-------------------------------------------------------------------------------------------------------------------------------------------------------------|
|                   |             |             |                                                                                                                                                             |
| 5                 | AMD         | AMD         | Removed the duplicates randomly.                                                                                                                            |
| 36                | IBD         | IBD         | These were duplicates between Crohns and UC studies. Removed the duplicates randomly.                                                                       |
| 5                 | FINLAND     | FINLAND     | Removed lower coverage (4x) Kuusamo samples in preference to the higher coverage (6x) SiSu samples.                                                         |
| 14                | GECCO       | GECCO       | Removed the duplicates randomly.                                                                                                                            |
| 17                | GoT2D       | FINLAND     | Removed the FINLAND samples.                                                                                                                                |
| 79                | GoT2D       | UK10K       | Removed the UK10K/UK10K duplicates, then removed randomly otherwise.                                                                                        |
| 34                | GPC         | BRIDGES     | Removed the GPC samples.                                                                                                                                    |
| 32                | GPC         | GPC         | Removed the duplicates randomly.                                                                                                                            |
| 14                | MCTFR       | MCTFR       | Removed the duplicates randomly.                                                                                                                            |
| 1                 | NEPTUNE     | NEPTUNE     | Removed the duplicates randomly.                                                                                                                            |
| 1                 | ORCADES     | 1000GP3     | Removed the ORCADES sample.                                                                                                                                 |
| 1                 | ProjectMinE | GoNL        | Removed the ProjectMinE sample.                                                                                                                             |
| 1                 | ProjectMinE | ProjectMinE | Removed the duplicates randomly.                                                                                                                            |
| 3                 | SardinIA    | SardinIA    | Removed the duplicates randomly.                                                                                                                            |
| 26                | UK10K       | UK10K       | These were monozygotic twins already identified by UK10K. Removed based on a list from UK10K of samples they had already excluded from downstream analysis. |

**Supplementary Table 7** : Details of duplicate removal. Each row of the table details the number of duplicate pairs found within and between studies together with the method by which duplicates were removed.
